1 **The Impact of COVID-19 on NO<sub>2</sub> and PM<sub>2.5</sub> Levels and Their Associations with Human**  
2 **Mobility Patterns in Singapore**

3

4 **Authors:** Li Yangyang<sup>a</sup>, Zhu Yihan<sup>b</sup>, Tan Jia Yu Karen<sup>a</sup>, Teo Hoong Chen<sup>c,d</sup>, Andrea Law<sup>a</sup>,  
5 Qu Dezhan<sup>e</sup>, Luo Wei<sup>a,\*</sup>

6

7 <sup>a</sup> Department of Geography, National University of Singapore, Singapore 117570

8 <sup>b</sup> School of Design and Environment, National University of Singapore, Singapore 117566

9 <sup>c</sup> Department of Biological Sciences, National University of Singapore, Singapore 117558

10 <sup>d</sup> Centre for Nature-based Climate Solutions, National University of Singapore, Singapore  
11 117558

12 <sup>e</sup> School of Information Science and Technology, Northeast Normal University, Changchun,  
13 China 130117

14 \*Corresponding author: [geowl@nus.edu.sg](mailto:geowl@nus.edu.sg)

15

16 **Key words**

17 COVID-19; Air pollutant; Human mobility; Correlation; Geospatial patterns

18 **Graphical Abstract**

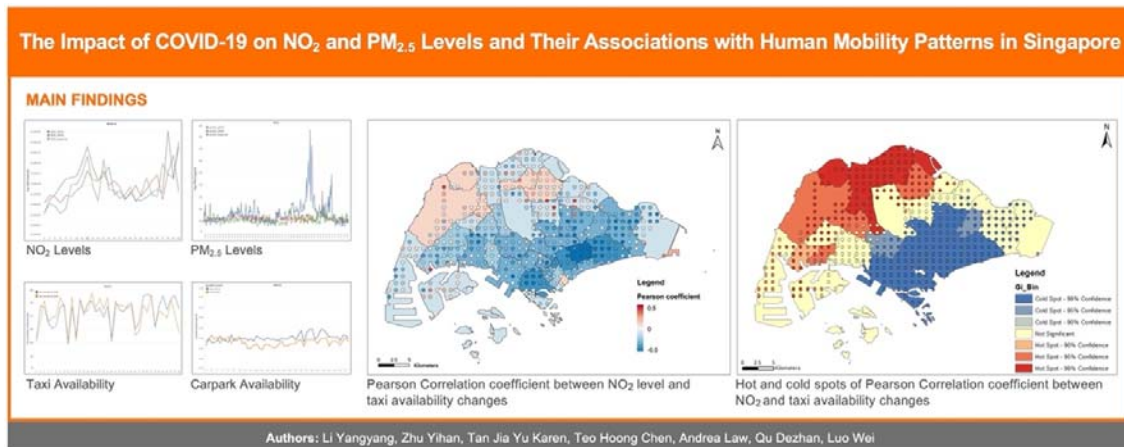

19

20 **Abstract**

21 The decline in NO<sub>2</sub> and PM<sub>2.5</sub> pollutant levels were observed during COVID-19 around the  
22 world, especially during lockdowns. Previous studies explained such observed decline with  
23 the decrease in human mobility, whilst overlooking the meteorological changes (e.g., rainfall,  
24 wind speed) that could mediate air pollution level simultaneously. This pitfall could  
25 potentially lead to over- or under-estimation of the effect of COVID-19 on air pollution.  
26 Consequently, this study aims to re-evaluate the impact of COVID-19 on NO<sub>2</sub> and PM<sub>2.5</sub>  
27 pollutant level in Singapore, by incorporating the effect of meteorological parameters in

28 predicting NO<sub>2</sub> and PM<sub>2.5</sub> baseline in 2020 using machine learning methods. The results  
29 found that NO<sub>2</sub> and PM<sub>2.5</sub> declined by a maximum of 38% and 36%, respectively, during  
30 lockdown period. As two proxies for change in human mobility, taxi availability and carpark  
31 availability were found to increase and decrease by a maximum of 12.6% and 9.8%,  
32 respectively, in 2020 from 2019 during lockdown. To investigate how human mobility  
33 influenced air pollutant level, two correlation analyses were conducted: one between PM<sub>2.5</sub>  
34 and carpark availability changes at regional scale and the other between NO<sub>2</sub> and taxi  
35 availability changes at a spatial resolution of 0.01°. The NO<sub>2</sub> variation was found to be more  
36 associated with the change in human mobility, with the correlation coefficients vary spatially  
37 across Singapore. A cluster of stronger correlations were found in the South and East Coast  
38 of Singapore. Contrarily, PM<sub>2.5</sub> and carpark availability had a weak correlation, which could  
39 be due to the limit of regional analyses. Drawing to the wider context, the high association  
40 between human mobility and NO<sub>2</sub> in the South and East Coast area can provide insights into  
41 future NO<sub>2</sub> reduction policy in Singapore.

42

## 43 **1. Introduction**

44 The outbreak of the novel coronavirus SARS-CoV-2 (COVID-19) pandemic has led to  
45 unprecedented scales of city-wide and nation-wide lockdowns around the world to reduce  
46 human contact and transmissions (Lai et al., 2020; Yin et al., 2021). Resultingly, the  
47 restrictions on human mobility within the country drastically decreased emissions coming  
48 from public and private vehicular transportations (Dolumbia et al., 2021). Singapore, a  
49 Southeast Asian megacity, is no exception to this disruption (Dickens et al., 2020; Li and  
50 Tartarini, 2020). On 7 April 2020, the Singapore government announced the commencement  
51 of a nation-wide lockdown locally known as the “Circuit Breaker” (Ministry of Health,  
52 2020a). This measure heavily restricted outdoor movements including commute to work,  
53 school and other activities. This has reportedly led to a reduction in traffic volume by 60%  
54 (Tan, 2020) four months into the Circuit Breaker, accounting for at least 44% reduction in  
55 emissions from transport-related sources (Jiang et al., 2021). The Circuit Breaker was then  
56 followed by three reopening phases (Ministry of Health, 2020b) which led to a rebound of  
57 vehicular greenhouse gas emissions as mobility increases (Di Domenico et al., 2020; Zhu et  
58 al., 2020; Jiang et al., 2021; Velasco, 2021).

59 Unlike cities suffering from severe air pollution where lockdown has reportedly resulted in an  
60 improvement in air quality (Liu et al., 2021; Bao and Zhang, 2020; Fu et al., 2020; Kerimray

61 et al., 2020), Singapore generally experiences a low level of air pollution mainly in the form  
62 of PM<sub>2.5</sub> even in the pre-COVID days (Zhu et al., 2020). Industries and vehicular emissions  
63 constitute one of the constant and major sources of air pollution in Singapore, with  
64 transboundary haze periodically affecting Singapore's air quality particularly in the months  
65 of August to October during the Southwest monsoon season (National Environment Agency,  
66 2021). In this context, the change in human mobility in the forms of vehicular traffic during  
67 and after Singapore's Circuit Breaker could therefore potentially lead to a spatial-temporal  
68 variation in air quality.

69 Since the onset of COVID-19 and enforcement of lockdown measures, a plethora of studies  
70 has been performed to investigate the effect of lockdown on air pollutions around the world.  
71 At regional scale, most of the studies was conducted on Asia (65%), followed by the  
72 European Union (18%), North America (6%), South America (5%), and Africa (3%) (Addas  
73 & Maghrabi, 2021). At national scale, India is the most studied country (29%), while about  
74 23% of the studies were performed on China and the rest on US (5%), UK (4%) and Italy  
75 (Addas & Maghrabi., 2021). These studies generally concluded a substantial reduction of air  
76 pollution level and a significant improvement in air quality compared during the COVID-19  
77 lockdown period compared to the pre-lockdown period. A number of air pollutants were  
78 being studies: PM<sub>2.5</sub>, PM<sub>10</sub>, NO<sub>2</sub>, NO<sub>x</sub>, O<sub>3</sub>, SO<sub>2</sub>, CO, NH<sub>3</sub> etc., among which NO<sub>2</sub> and PM<sub>2.5</sub>  
79 were found to have the most prominent decline during the lockdown period (Faridi et al.,  
80 2021). For instance, Sale city (Morocco) experienced as high as 96% reduction in NO<sub>2</sub> during  
81 the lockdown period (Otamani et al., 2020), and reduction in PM<sub>2.5</sub> was reported ranging  
82 from 76.5% in Malaysia, 58% in Spain and 53.1% in Dehli (Faridi et al., 2021). However,  
83 there exist difficulties to compare these results as different methods were used to investigate  
84 changes in air pollutants level. Most studies confined the segments of their study periods to  
85 only a few months, either comparing the air pollution level during and right before the  
86 lockdown period in 2020 or comparing the air pollution level of lockdown period with those  
87 in the same period of previous years. Moreover, lockdown measures had been implemented  
88 in multiple phases, with various level of restrictions in different countries (Faridi et al., 2021).  
89 Some countries enforced complete lockdown, while some implemented partial measures.  
90 Such differences led to great uncertainties when comparing air pollution reduction across  
91 different countries (Faridi et al., 2021).

92 The observed decline in air pollutant level has been attributed to the reduction of  
93 transportation emissions and restriction on industrial, economic and production activities  
94 (Addas & Maghrabi, 2021; Faridi et al., 2021). This is potentially due to that vehicular

95 emissions and road transport are the most notable sources of ambient  $PM_{2.5}$  and  $NO_2$   
96 (European Environmental Agency, 2019). Figure 1 shows that road transport is the largest  
97 source of  $NO_x$  (Including  $NO_2$ ) and also, the second largest source of  $PM_{2.5}$  (European  
98 Environmental Agency, 2019). There is a consensus among researchers that the decrease in  
99  $PM_{2.5}$  and  $NO_2$  levels during lockdown could be largely due to the restricted mobility.  
100 However, only few have continued to quantify the effect of lockdown on mobility patterns  
101 and their association with air pollution levels. As one of such few studies, Bao and Zhang  
102 (2020) reported strong associations between decrease in air pollution and travel restrictions in  
103 44 cities in northern China. In the U.S, Archer et al. (2020) also found strong correlation  
104 between decline in  $NO_2$  level and reduced mobility index (MI), slight increase in  $PM_{2.5}$  level,  
105 as well as no correlation between  $PM_{2.5}$  and MI during April 2020. This was likely due to the  
106 unchanged operation of the major sources of  $PM_{2.5}$  in the U.S, that is, diesel-based  
107 commercial trucks and coal-based electricity generation. Overall, this suggests that the degree  
108 of the impact of restricted mobility on air pollution is context and location specific. In  
109 Singapore, only a few studies (Li & Tartarini, 2020; Zhu et al., 2020; Velasco, 2021)  
110 investigated the impact of circuit breaker on mobility and air pollution. Zhu et al. (2020)  
111 concluded that workplace mobility had a significant positive relationship with  $PM_{2.5}$  levels  
112 between 15<sup>th</sup> Feb to 1<sup>st</sup> June 2020. Li and Tartarini (2020) reported a 29% and 45% decrease  
113 in  $PM_{2.5}$  and  $NO_2$  levels during 2020 lockdown period (7<sup>th</sup> Apr – 11<sup>th</sup> May) compared to the  
114 same period in previous years. Such changes of  $PM_{2.5}$  and  $NO_2$  were found to be  
115 significantly associated with reduced mobility (i.e., HDB carpark availability, Apple driving  
116 mobility index, and Google Public transit index) (Li and Tartarini, 2020).  
117

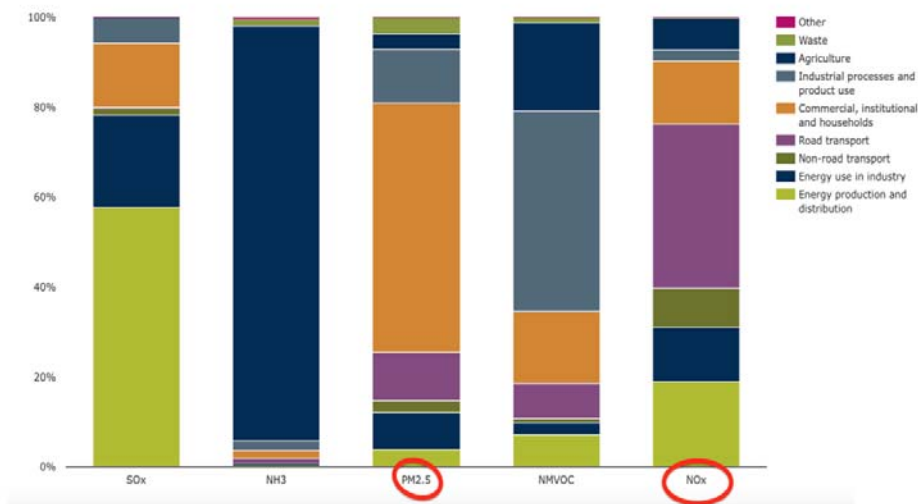

118

119

*Figure 1. The emission sources of the main air pollutants by sector (modified from European Environmental Agency, 2019).*

120

121 Besides reduced mobility, it's well evident that meteorological factors, such as wind speed,  
 122 wind, wind direction, temperature, precipitation, humidity affect air pollution level (Seinfeld  
 123 and Pandis, 2016; Yousefian et al., 2020; Jiang et al., 2021; Hua et al., 2021). However,  
 124 many existing studies did not quantify the effect of meteorological changes on air pollutant  
 125 level during COVID-19. To date, most studies only compared the air pollution during  
 126 lockdown with a baseline value (i.e., the estimated 2020 air pollutant level without COVID-  
 127 19 measures) calculated from historical pollution data. When meteorology was accounted for,  
 128 the meteorological data were simply used for qualitative interpretation of the measured air  
 129 pollutant level in 2020 (Faridi et al., 2021). Likewise, Li and Tartarini (2020) only used  
 130 meteorological data to demonstrate that the monthly averaged meteorological parameters (i.e.,  
 131 temperature, relative humidity, daily rainfall, wind direction) in Singapore during Apr-May  
 132 2020 were not significantly different from those of the same period in previous years, thereby  
 133 justifying their conclusion that the meteorology condition didn't have much influence on the  
 134 air pollution level of their period of interest. However, this conclusion may not be reliable as  
 135 it rests on comparison of monthly average of the studied period alone. This paper thus, argues  
 136 that the effect of COVID-19 on air quality could potentially be over- or under-estimated.  
 137 Otmani et al. (2020) observed increased wind speed, humidity and precipitation during  
 138 lockdown in Sale city (Morocco), which could decrease air pollutant concentration alongside  
 139 the positive impact of lockdown restriction and reduced transportation. At the same time,  
 140 unfavourable meteorological condition can offset the positive impacts of lockdown. Hua et al  
 141 (2021) reported that the control measures reduced  $PM_{2.5}$  by  $12 \mu g/m^3$  in Beijing, whereas the

142 meteorology contributed to an increase of  $30 \mu\text{g}/\text{m}^3$  in  $\text{PM}_{2.5}$ , resulting in increased  $\text{PM}_{2.5}$   
143 level during lockdown. Therefore, it is important to quantitatively differentiate the impacts of  
144 lockdown and meteorology on air pollutant level during COVID-19.

145 Another research gap is that existing studies mostly assessed the temporal correlation  
146 between air pollution level and mobility pattern (Li & Tartarini, 2020; Zhu et al., 2020; Bao  
147 & Zhang, 2020; Otmani et al., 2020; Archer et al., 2020). Given both air pollution and  
148 mobility are phenomenon with both spatial homogeneity and heterogeneity, this study  
149 purports that spatial autocorrelation should be conducted for the correlation value between air  
150 pollution change and mobility change during COVID-19. Spatial autocorrelation can help to  
151 identify clusters of high correlation between air pollution and mobility, or in other words,  
152 areas where mobility variation contributed more to air pollution change.

153 To account for the variability of the lockdown measures and to increase comparability of  
154 results, this study will analyse the air pollutants concentration trend spanning the entire year  
155 2020, rather than confining analysis to a pre-defined lockdown period. Singapore had  
156 implemented different phases of measure before opening up in 2020. Expanding period of  
157 interest from months to year can avoid bias by covering a wide range of situations from  
158 complete lockdown, partial lockdown, gradual opening up, to complete opening up phases.  
159 As a result, this study expects the long-term correlation between air pollutants level and  
160 mobility indexes to be more reliable than the correlation results calculated solely from the air  
161 pollutant and mobility data of the complete lockdown months. To quantitatively differentiate  
162 the impact of meteorology from that of lockdown, this study will estimate the baseline air  
163 pollution level for 2020 using weather data and haze occurrence records. For instance, a  
164 comparatively haze-free condition in Singapore in 2020 (Taufik, 2020) compared to 2019  
165 could suggest a smaller increase in the existing  $\text{PM}_{2.5}$  and  $\text{NO}_2$  levels. To uncover the spatial  
166 variation of the effect of mobility changes on air pollution, this study will perform spatial  
167 autocorrelation.

168 In short, this study aims to 1) quantify the continuous changes in  $\text{PM}_{2.5}$  and  $\text{NO}_2$   
169 concentration before, during, and after the onset of COVID-19 throughout 2020 in Singapore,  
170 2) to evaluate the association between changes in  $\text{PM}_{2.5}$  and  $\text{NO}_2$  concentration and the  
171 mobility trends throughout 2020, and 3) to identify clusters of stronger correlation between  
172  $\text{PM}_{2.5}$  or  $\text{NO}_2$  concentration and mobility by performing spatial autocorrelation. Human  
173 mobility is commonly understood as the movement of individuals either on foot or via  
174 various modes of public and private vehicular transportation. For the purpose of this study,  
175 this paper assumed that vehicular transportation operated on private demands such as private

176 cars and taxis closely approximates the degree of human mobility during the study period  
177 (Jiang et al., 2021). Results from this study can be used to understand the impact of  
178 anthropogenic activities, in particular the traffic patterns, on air quality and to inform  
179 effective and targeted strategies for reducing air pollution level in the future beyond the  
180 COVID-19 period.

## 181 **2. Material and Methods**

182 This study makes comparisons among two sets of data. The first comparison was conducted  
183 at higher temporal resolution (daily) but lower spatial resolution (regional), using  $PM_{2.5}$  for  
184 air pollution and Housing Development Board (HDB) carpark availability as a proxy for  
185 mobility. As approximately 81% of the entire Singaporean population lives in HDB flats  
186 (Singapore Statista, 2021), HDB carpark availability can be used as a proxy for human  
187 mobility in Singapore. The second comparison was conducted at lower temporal resolution  
188 (weekly) but higher spatial resolution ( $0.01^\circ$ ) data, using  $NO_2$  for air pollution and taxi  
189 availability as a proxy for mobility. Compared to carparks which are stationary and  
190 constrained to HDB residential locations, taxis travel around the island and can cover a  
191 wider range of locations. Therefore, taxi availability was selected as the mobility proxy for  
192 the comparison of higher spatial resolution. A higher carpark availability and a lower taxi  
193 availability implies there is a higher human mobility.

### 194 2.1. Impact of COVID-19 on $NO_2$ and $PM_{2.5}$ levels

195  $NO_2$  data was sourced from the Sentinel-5P TROPOMI level 3 product, a global dataset at  
196 high spatial resolution of  $0.01^\circ$  and revisit time of around 1 day. The data was downloaded  
197 from the Google Earth Engine Data Catalog (Google Developers, 2021) for analysis.  $PM_{2.5}$   
198 data was sourced from the National Environment Agency (NEA) Application Programming  
199 Interface (API) (NEA, 2021b). The data is of high velocity (temporal resolution) updated  
200 every hour but is relatively coarse with observations provided for five regions (Figure 2) in  
201 Singapore. The original data pulled from API was resampled first and the details are  
202 summarized in Table 1.

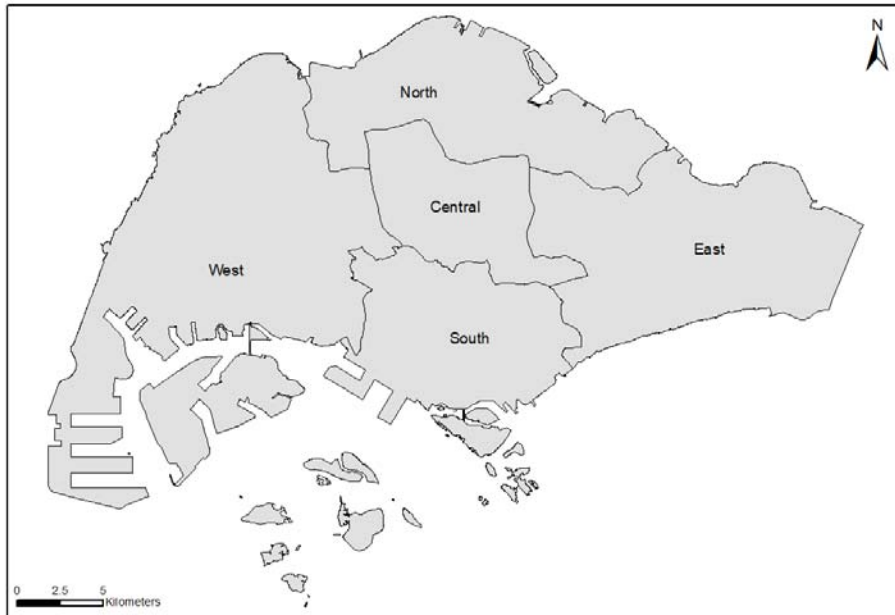

203

204 *Figure 2. Five regions of Singapore used in this study.*

205 *Table 1. A summary of temporal and spatial resolutions before and after data resampling.*

|                     |           | PM <sub>2.5</sub> | NO <sub>2</sub> | Weather              |        |
|---------------------|-----------|-------------------|-----------------|----------------------|--------|
| Temporal resolution | Original  | Hourly            | Daily           | Up to 1 min interval |        |
|                     | Resampled | Daily             | Weekly          | Daily                | Weekly |
| Spatial resolution  | Original  | Regional          | 1.11 km         | Station locations    |        |
|                     | Resampled |                   | 0.01°           | Regional             | 0.01°  |

206

(Notes: The daily and regional weather data was used for 2020 PM<sub>2.5</sub> baseline prediction, while weather data of weekly resolution and 0.01° spatial resolution was used for 2020 NO<sub>2</sub> baseline prediction)

209

210

To study how NO<sub>2</sub> and PM<sub>2.5</sub> levels changed from 2019 to 2020 as a result of COVID-19, the 2020 air pollutants level without COVID-19 measures were estimated and used as the basis of comparison, which will be referred to as the baseline value in this paper. Changes in NO<sub>2</sub> and PM<sub>2.5</sub> levels were calculated from the differences between the measured air pollutant level in 2020 and the baseline. The conventional practice of using the measured NO<sub>2</sub> and PM<sub>2.5</sub> in 2019 as the basis of comparison ignores the fact that air quality could be affected by the meteorological condition changes from time to time. For example, a better air quality could be observed with a higher wind speed and precipitation even with a negligible change in mobility (Megaritis et al., 2014; Ahmad et al., 2011). Existing literature have acknowledged that meteorological parameters are important inputs for the predictions of air

219



220 pollutant levels using machine learning methods (Iskandaryan et al., 2020; Rybarczyk &  
221 Zalakeviciute, 2018). Therefore, weather data including rainfall intensity, wind speed, wind  
222 direction, temperature, and relative humidity, were used as part of the input variables for NO<sub>2</sub>  
223 and PM<sub>2.5</sub> baseline prediction. The weather data were retrieved from the NEA API (NEA,  
224 2021c). All weather parameters were first resampled to a daily resolution, where the ordinary  
225 kriging method (Wackernagel, 2003) was then used to interpolate them into a spatial  
226 resolution of 0.01° from the daily measurements at the locations of weather stations (Figure  
227 3). The interpolated daily weather data was used for PM<sub>2.5</sub> baseline prediction and resampled  
228 further to a weekly resolution for NO<sub>2</sub> baseline prediction. Moreover, to account for the  
229 influence of the haze event in September 2019 on NO<sub>2</sub> and PM<sub>2.5</sub> levels, the relative number  
230 of haze searches in Google Trends (Google, 2021) from 2019 to 2020 were also used as an  
231 input variable. In addition, location information including the longitudes and latitudes, and  
232 categorical regions (i.e., Central, North, South, West, and East) encoded using one hot  
233 encoder were used as inputs in predicting NO<sub>2</sub> and PM<sub>2.5</sub> levels, respectively. The location  
234 was considered as input variables as they were related to spatially varied factors such as  
235 landcovers and land uses that could influence NO<sub>2</sub> and PM<sub>2.5</sub> levels (Xu et al., 2016), or  
236 contributions from consistent emissions from sectors other than road transport.  
237

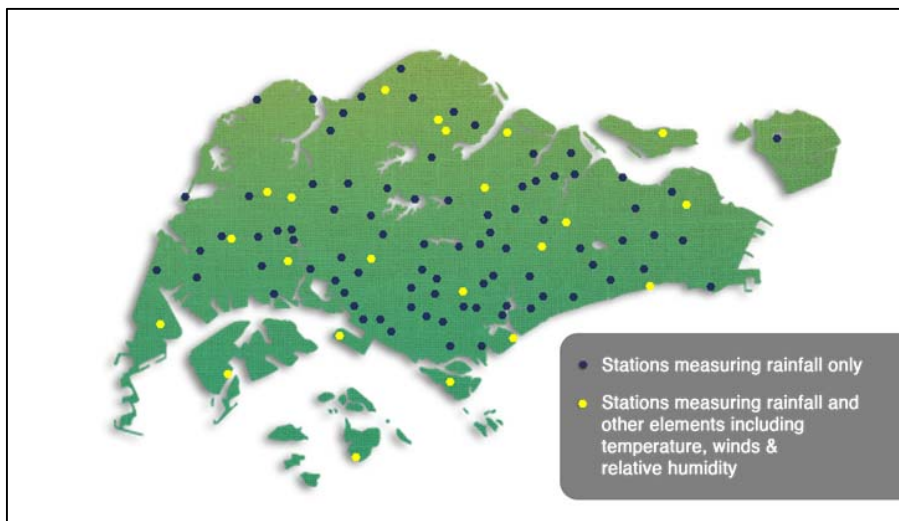

238  
239 *Figure 3. Location of weather stations in Singapore (NEA, 2021d).*

240 In this study, two machine learning methods, Random Forest (RF) and deep neural network  
241 (DNN), were used since they have been commonly used in different studies on air pollutant  
242 levels predictions (Zhan et al., 2018; Wang & Song, 2018). The meteorological, location, and  
243 haze information in 2019 were input variables and the NO<sub>2</sub> and PM<sub>2.5</sub> levels in 2019 were

244 outputs to train and validate each machine learning model. 80% of 2019 data was used in  
 245 training and the remaining 20% was used to validate the trained model. Then the  
 246 meteorological, location, and haze information in 2020 were used to predict the baseline NO<sub>2</sub>  
 247 and PM<sub>2.5</sub> levels in 2020. The changes in PM<sub>2.5</sub> and NO<sub>2</sub> levels were then calculated from the  
 248 differences between the measurements in 2020 and the corresponding baseline predictions.  
 249 The change in PM<sub>2.5</sub> was obtained in a daily temporal resolution from each region and the  
 250 change in NO<sub>2</sub> was obtained in a weekly temporal resolution but with a spatial resolution of  
 251 0.01°.

252

### 253 2.2. Impact of COVID-19 on taxi availability and carpark availability

254 HDB Carpark and taxi availability were sourced from the DataMall API (LTA, 2021).  
 255 Carpark data is available at 1-minute interval, and taxi availability is available at 30 second  
 256 intervals. Table 2 summarises the original taxi and carpark availability data. The taxi  
 257 availability data was normalised according to the total taxi amount change in the monthly  
 258 data of Singapore from 2019 to 2020. The island wide monthly taxi population data was  
 259 sourced from DataMall (LTA, 2021).

260 *Table 2. A summary of temporal and spatial resolutions of carpark and taxi availability*  
 261 *before and after data resampling*

|                     |           | Carpark Availability | Taxi Availability |
|---------------------|-----------|----------------------|-------------------|
| Temporal resolution | Original  | 1 minute             | 30 seconds        |
|                     | Resampled | Daily                | Weekly            |
| Spatial resolution  | Original  | Exact Locations      | Exact Locations   |
|                     | Resampled | Regional             | 0.01°             |

262

263 The changes in taxi and carpark availability were calculated from the differences between the  
 264 measurements in 2020 and 2019. The change in carpark availability for each region was  
 265 obtained in a daily temporal resolution at regional scale and the change in taxi availability  
 266 was obtained in a weekly temporal resolution with a spatial resolution of 0.01°.

267

### 268 2.3. Correlations

269 Two correlation analyses, one between PM<sub>2.5</sub> level change and carpark availability change,  
 270 and the other between NO<sub>2</sub> level change and taxi availability change, were carried out. In

271 order to accommodate the large quantity of data points and the high variety of data properties  
272 of these data points, three correlation methods were carried out: Pearson, Spearman's Rank,  
273 and Kendall Rank Correlations (Chok, 2010). Pearson correlation evaluates the linear  
274 relationship between two continuous variables. Nevertheless, Pearson correlation is very  
275 sensitive to outliers, which may lead to a weak correlation for data distributed in high  
276 skewness (Akoglu, 2018; Chok, 2010). Spearman's Rank Correlation evaluates the  
277 monotonic relationship, which is based on the ranked values for each variable rather than the  
278 raw data, thus it is not limited to some of the assumptions (e.g., normal distribution of  
279 variables). Kendall Rank Correlation is similar to Spearman's rank correlation but usually has  
280 a smaller value (Berg, 2021). Kendall Rank Correlation is calculated based on concordant  
281 and discordant pairs, which is less sensitive to errors such as null values in dataset (Tarsitano,  
282 2009). Due to the large quantity of data points (421 locations), it was for the most suitable  
283 correlation method. In addition, these data points were geographically distributed, thus their  
284 data properties were expected to vary spatially. A single correlation method (e.g., Pearson)  
285 may fail to capture other types of bivariate relationships (e.g., non-normally distributed data).  
286 Therefore, the correlations between the two sets of variables, as well as their significance,  
287 were calculated using three correlation methods: Pearson, Spearman's Rank, and Kendall  
288 Rank Correlations. All the three correlations' coefficients vary from 1 to -1, indicating  
289 positive and negative correlations, respectively. A value close to 0 indicates a very weak  
290 correlation.

291 For PM<sub>2.5</sub> level and carpark availability, the three correlation methods were conducted both in  
292 an island scale and a regional scale. For NO<sub>2</sub> level and taxi availability, the three correlation  
293 methods were performed both in an island scale and at a spatial resolution of 0.01°, with a  
294 temporal resolution of every 7 days. Only points with a minimum of 25 observations for both  
295 NO<sub>2</sub> and taxi availability during the studied period were included in the correlation analysis.  
296 Correlations were also conducted for each planning area using all observations within the  
297 corresponding planning area (Administrative boundaries in Singapore). Planning area  
298 boundaries was sourced from Urban Redevelopment Authority (URA, 2021).

299

#### 300 2.4. Spatial autocorrelation of correlation coefficients

301 Hot and cold spot analysis was conducted using the Getis-Ord Gi\* statistic method to  
302 determine statistically significant hot and cold spots for the three correlation coefficients (i.e.,  
303 Pearson's r, Spearman's rho and Kendall's tau) between NO<sub>2</sub> and taxi availability changes.

304 To determine the most appropriate threshold distances, the incremental spatial autocorrelation  
305 by distance for 10 distance bands was analysed. The distance band with the peak z-score was  
306 selected as the threshold distance.  
307

308 **3. Results and Discussion**

309 3.1. Impact of COVID -19 on NO<sub>2</sub> and PM<sub>2.5</sub> levels

310 The weekly comparison of mean NO<sub>2</sub> tropospheric column densities in 2019 and 2020 in  
311 Figure 4(a) only illustrates weeks with NO<sub>2</sub> measurements both in 2019 and 2020. Overall,  
312 there was a decrease in NO<sub>2</sub> levels from 2019 to 2020 observed between Weeks 5 to 20. The  
313 decrease started from the 5<sup>th</sup> week, which was before the lockdown started. Similarly, from  
314 the daily comparison of regional PM<sub>2.5</sub> concentrations in 2019 and 2020 in Figure 4(b), an  
315 overall decrease in PM<sub>2.5</sub> levels from 2019 to 2020 was observed. This decrease was observed  
316 to be more significant in September 2020, because the severe haze event detected in  
317 September 2019 and the haze-free condition in Sep 2020 together contributed to a large  
318 difference. However, little difference was found for the regional PM<sub>2.5</sub> levels due to a limited  
319 data spatial resolution.

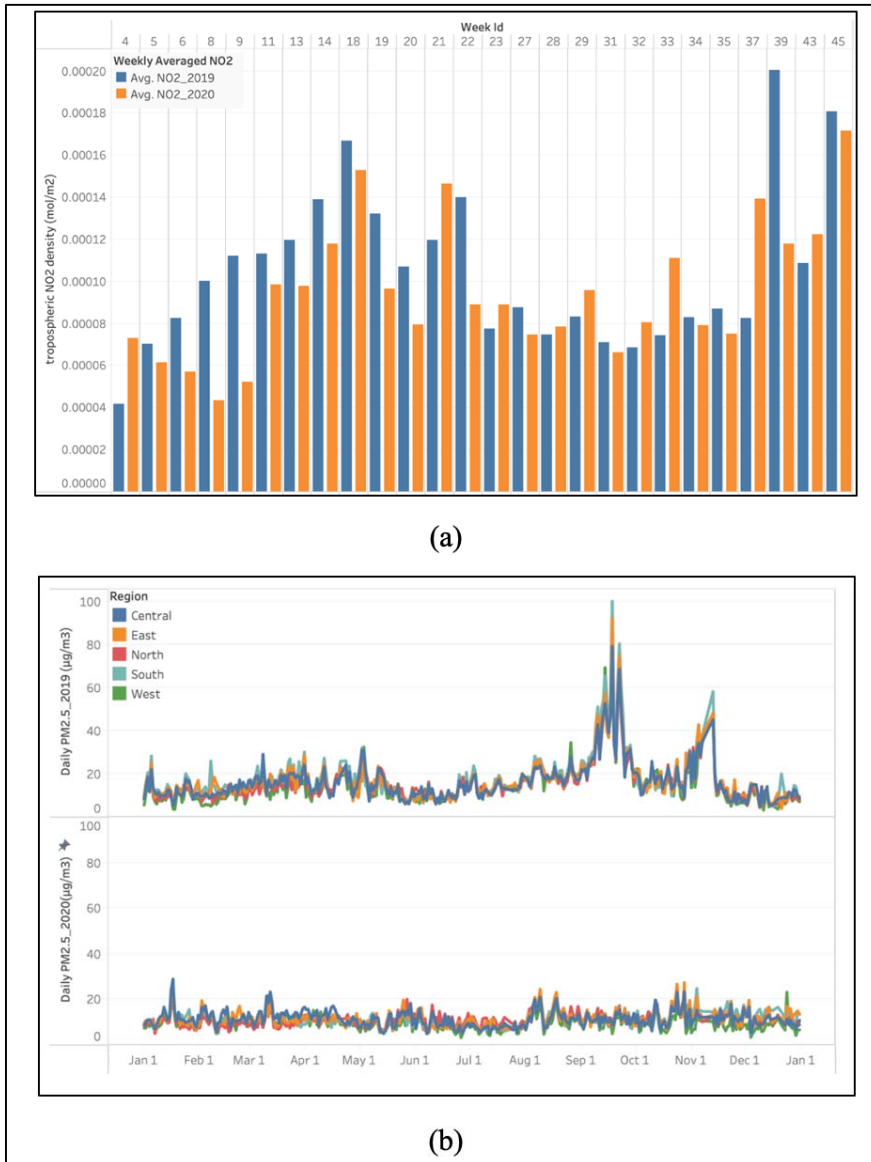

320

321 *Figure 4. A general comparison of (a) NO<sub>2</sub> and (b) PM<sub>2.5</sub> measurements in 2019 and 2020.*

322 Using RF and DNN methods , NO<sub>2</sub> and PM<sub>2.5</sub> baselines in 2020 were predicted. Both  
 323 machine learning models were trained and tested first using 2019 data before baseline  
 324 predictions. Figure 5 shows the time series data in 2019 that was used in the model training,  
 325 including NO<sub>2</sub> meteorological and haze information.

326

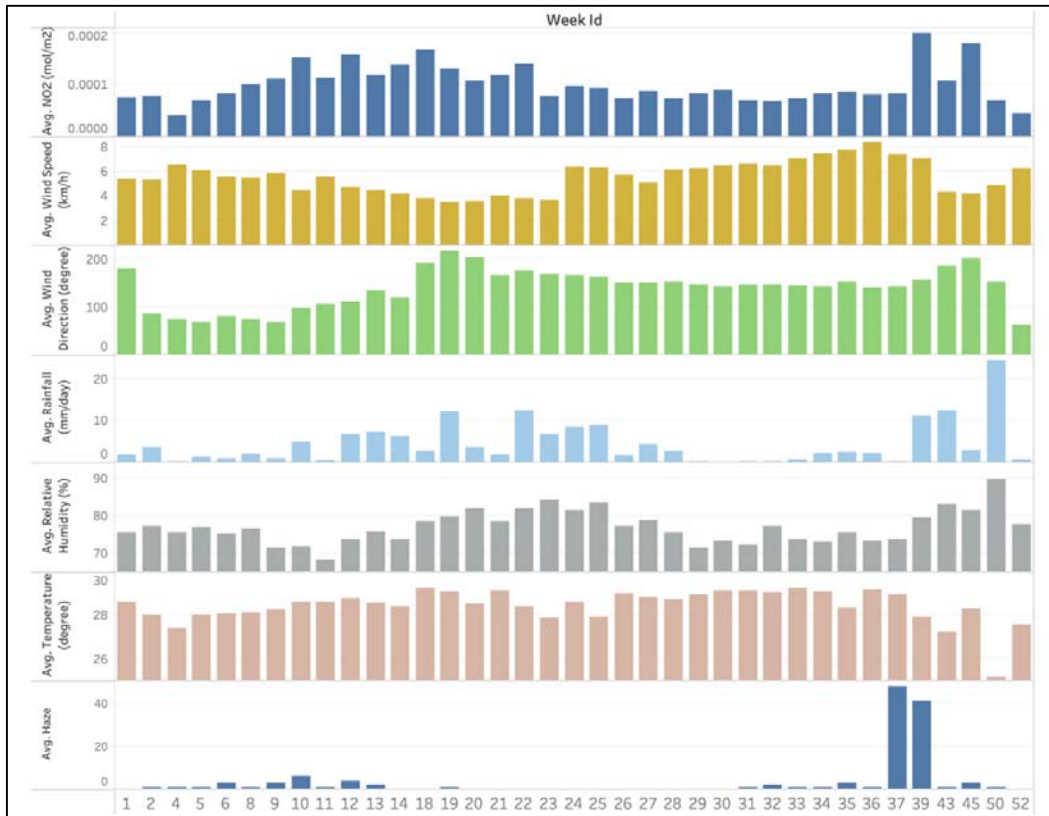

327

328 *Figure 5. NO<sub>2</sub>, meteorological and haze information in 2019.*

329 Using the two machine learning methods, the comparison of the predicted NO<sub>2</sub> and the  
 330 measured NO<sub>2</sub> levels in 2019 is shown in Figure 6, from training and testing datasets,  
 331 respectively. The mean absolute error (MAE), the root means square error (RMSE), as well  
 332 as R<sup>2</sup> from RF and DNN training and testing datasets are summarized in Table 3. Both  
 333 methods show similar performance with similar levels of errors (i.e., 5.9e-06 in MAE for RF  
 334 and 6.0e-06 for DNN, and same RMSE) and accuracy (i.e., 0.971 for RF and 0.964 for DNN).  
 335 Due to its less computation time, RF was subsequently selected to predict the NO<sub>2</sub> baseline in  
 336 2020, as well as to train the PM<sub>2.5</sub> model and predict PM<sub>2.5</sub> baseline in 2020.

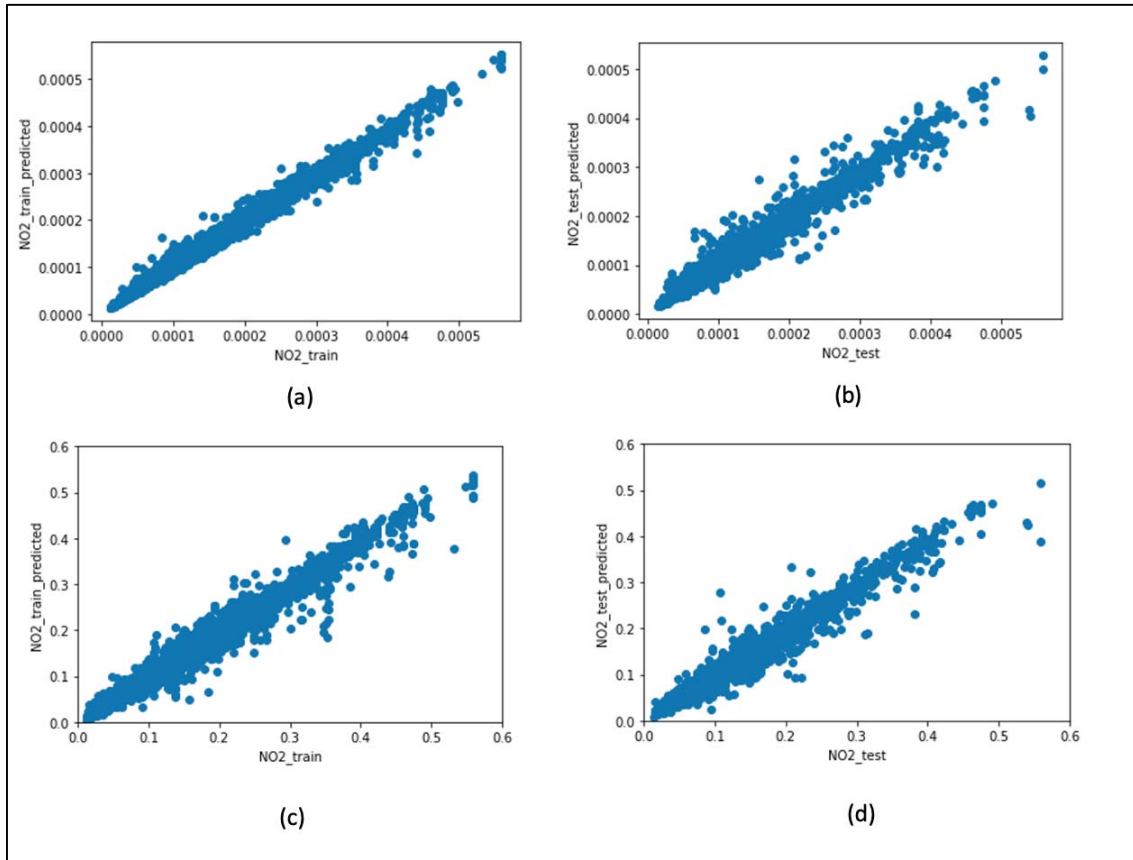

337  
 338 *Figure 6. Predicted NO<sub>2</sub> versus the measured NO<sub>2</sub> levels (10<sup>-3</sup> mol/m<sup>2</sup>) from the (a) training*  
 339 *and (b) testing datasets using RF and (c) training and (d) testing datasets using DNN.*

340

341 *Table 3. Summarized errors from RF and DNN in NO<sub>2</sub> modelling.*

|     |          | MAE (mol/m <sup>2</sup> ) | RMSE (mol/m <sup>2</sup> ) | R <sup>2</sup> |
|-----|----------|---------------------------|----------------------------|----------------|
| RF  | Training | 2.3e-06                   | 4.5e-06                    | 0.996          |
|     | Testing  | 5.9e-06                   | 1.1e-05                    | 0.971          |
| DNN | Training | 4.0e-06                   | 7.9e-06                    | 0.984          |
|     | Testing  | 6.0e-06                   | 1.1e-05                    | 0.964          |

342

343 Figure 7 shows the 2019 PM<sub>2.5</sub>, meteorological and haze time series data used in the model  
 344 training. Using RF method, the predicted PM<sub>2.5</sub> and the measured PM<sub>2.5</sub> levels from the  
 345 training and testing datasets in 2019 were obtained (Figure 8). The MAE, RMSE and R<sup>2</sup> in  
 346 training and testing datasets are summarized in Table 4. The model did not perform well at  
 347 high PM<sub>2.5</sub> levels (beyond 60 µg/m<sup>3</sup>), and a difference between predicted and measured  
 348 values was observed during validation. This could potentially result from the limited number



349 of high PM<sub>2.5</sub> records (i.e., only during the haze period) for training and testing. However, as  
350 there was no severe haze in 2020 and the measured PM<sub>2.5</sub> did not exceed 60 μg/m<sup>3</sup>. Hence,  
351 the predicted results maintain their validity.

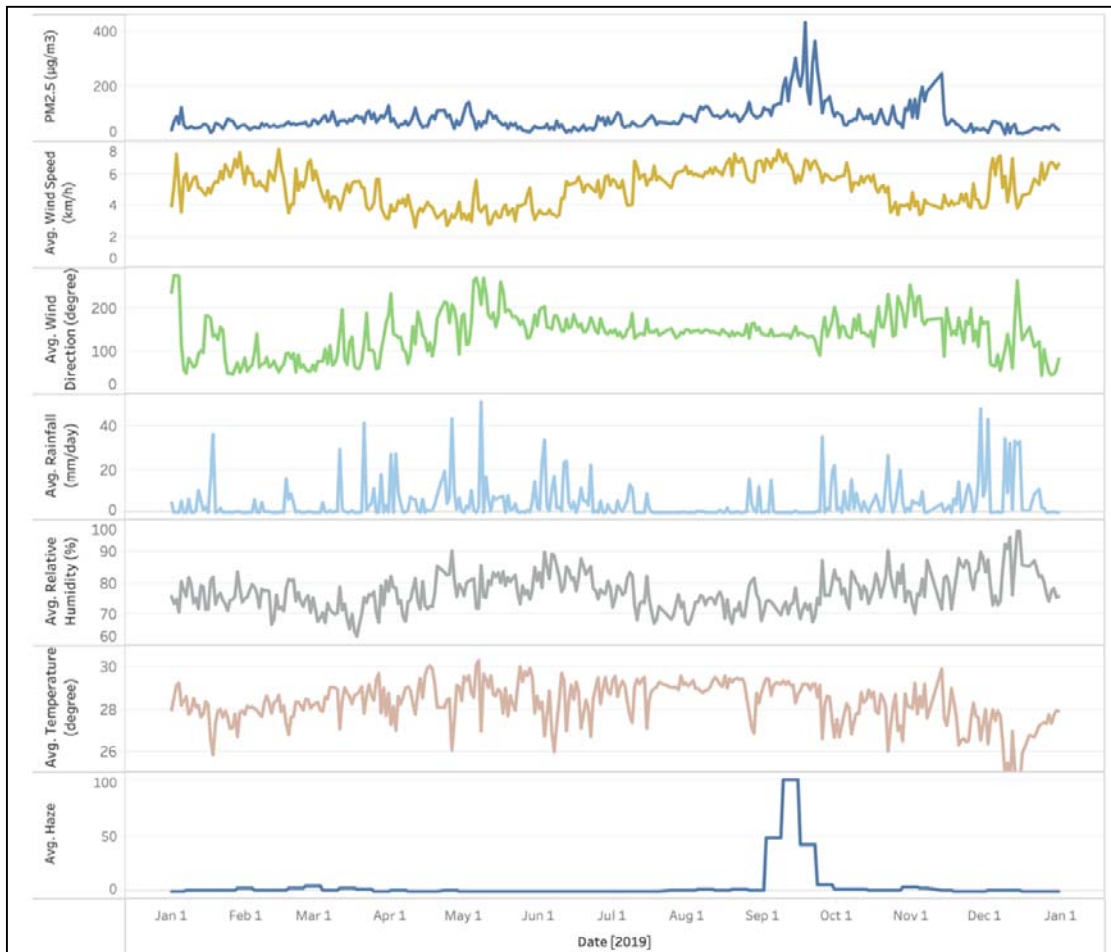

352  
353 *Figure 7. PM<sub>2.5</sub>, meteorological and haze information in 2019.*

354

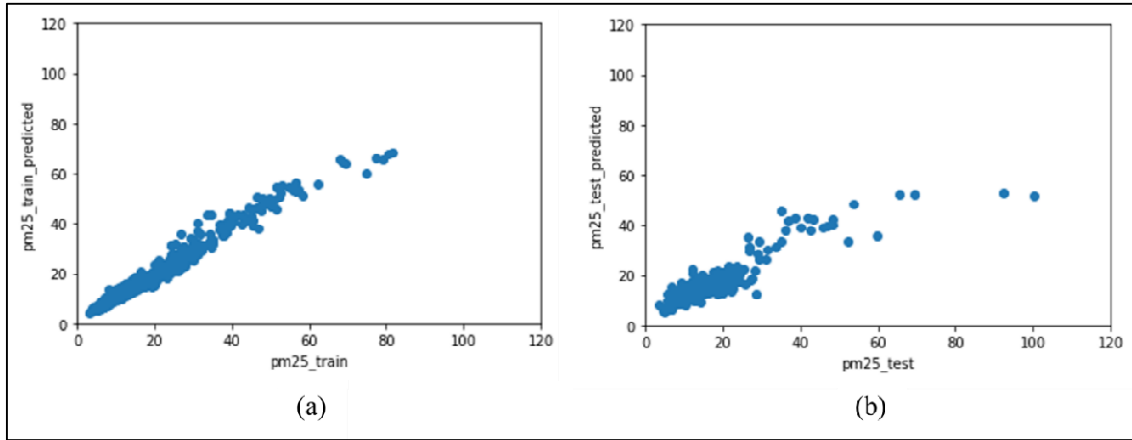

355

356 *Figure 88. Predicted  $PM_{2.5}$  versus the measured  $PM_{2.5}$  levels ( $10^{-3} \text{ mol/m}^2$ ) from the (a)*  
 357 *training and (b) testing datasets using RF.*

358

359 *Table 4. Summarized errors from RF in  $PM_{2.5}$  modelling.*

|    |          | MAE ( $\mu\text{g/m}^3$ ) | RMSE ( $\mu\text{g/m}^3$ ) | $R^2$ |
|----|----------|---------------------------|----------------------------|-------|
| RF | Training | 1.1                       | 1.7                        | 0.964 |
|    | Testing  | 3.0                       | 5.1                        | 0.607 |

360

361 From the comparison of feature importance of each input variable in the RF model (Figure 9),  
 362 a relatively similar degree of importance for  $\text{NO}_2$  modelling while a much higher importance  
 363 of haze ( $> 0.5$ ) in  $PM_{2.5}$  modelling were found. Locations and wind properties (speed and  
 364 direction) are comparatively more important (i.e., larger than 0.12) in  $\text{NO}_2$  modelling.  
 365 Comparatively, the importance of location is very low in  $PM_{2.5}$  modelling, implying little  
 366 difference in the  $PM_{2.5}$  comparison across different regions, potentially due to the large study  
 367 area of the regions preventing finer detection of variation.

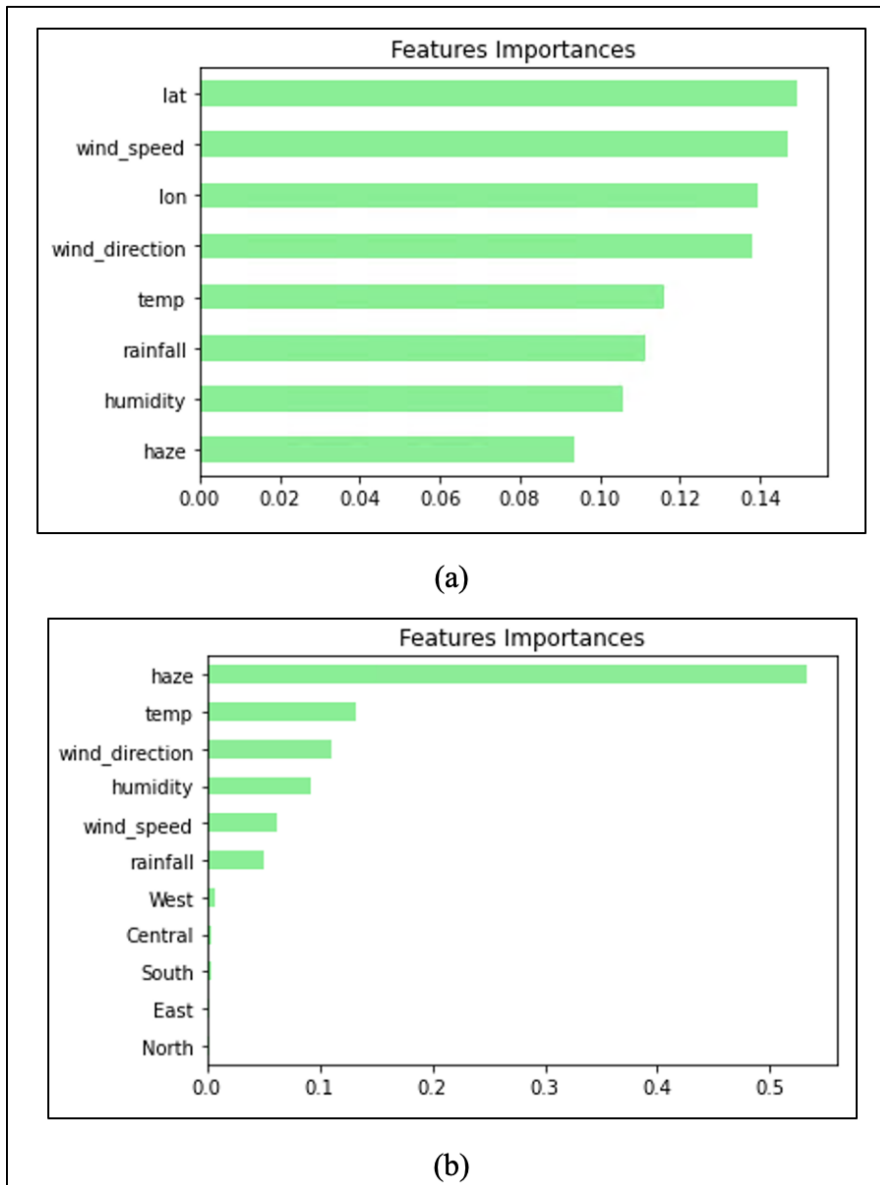

368

369 *Figure 9. Feature importance in (a)  $NO_2$  and (b)  $PM_{2.5}$  modelling using RF.*

370 From the comparison of the measured  $NO_2$  levels between 2019 and 2020 in Figure 10 (a), a  
 371 decrease in  $NO_2$  levels before Week 20 in 2020 was observed. However, by comparing  
 372 measured values in 2020 and the predicted baseline use RF method, there was an increase in  
 373  $NO_2$  levels from Week 11 to Week 18, followed by a significant decrease (i.e., about 38%) in  
 374  $NO_2$  levels in Week 20. Similarly, without baseline prediction, the effect of COVID-19 on  
 375  $PM_{2.5}$  levels could also be overestimated. For instance, in Figure 10 (b), by comparing the  
 376 measured  $PM_{2.5}$  levels in 2019 and 2020, there was a significant decrease in  $PM_{2.5}$  levels up to  
 377 67% during lockdown period. However, by comparing the predicted baseline and the  
 378 measurements in 2020, the decrease was only up to 36%. In both  $NO_2$  and  $PM_{2.5}$  baseline

379 prediction, the effect of haze and meteorological parameters in each location was taken into  
380 consideration, providing a more reliable estimation on the change in air pollutant levels  
381 during COVID-19, including both the lockdown and opening-up period. By only taking  
382 lockdown period into study and simply comparing the measured NO<sub>2</sub> and PM<sub>2.5</sub> levels in  
383 2020 and 2019, the observed decrease during the lockdown could result in a direct intuition  
384 that lockdown helped in reducing NO<sub>2</sub> and PM<sub>2.5</sub> levels significantly, which may  
385 overestimate the effect of lockdown. However, the overall change in PM<sub>2.5</sub> is not obvious.  
386 This could be due to a change in PM<sub>2.5</sub> emissions from other sources occurring at the same  
387 time when there was a change in PM<sub>2.5</sub> emissions from road transport. Given household  
388 emission is one of the top sources of PM<sub>2.5</sub> emission (Figure 1), the work-from-home  
389 arrangement during COVID-19 can possibly lead to an increased household emission,  
390 offsetting the decreased vehicular PM<sub>2.5</sub> emission on the road.

391

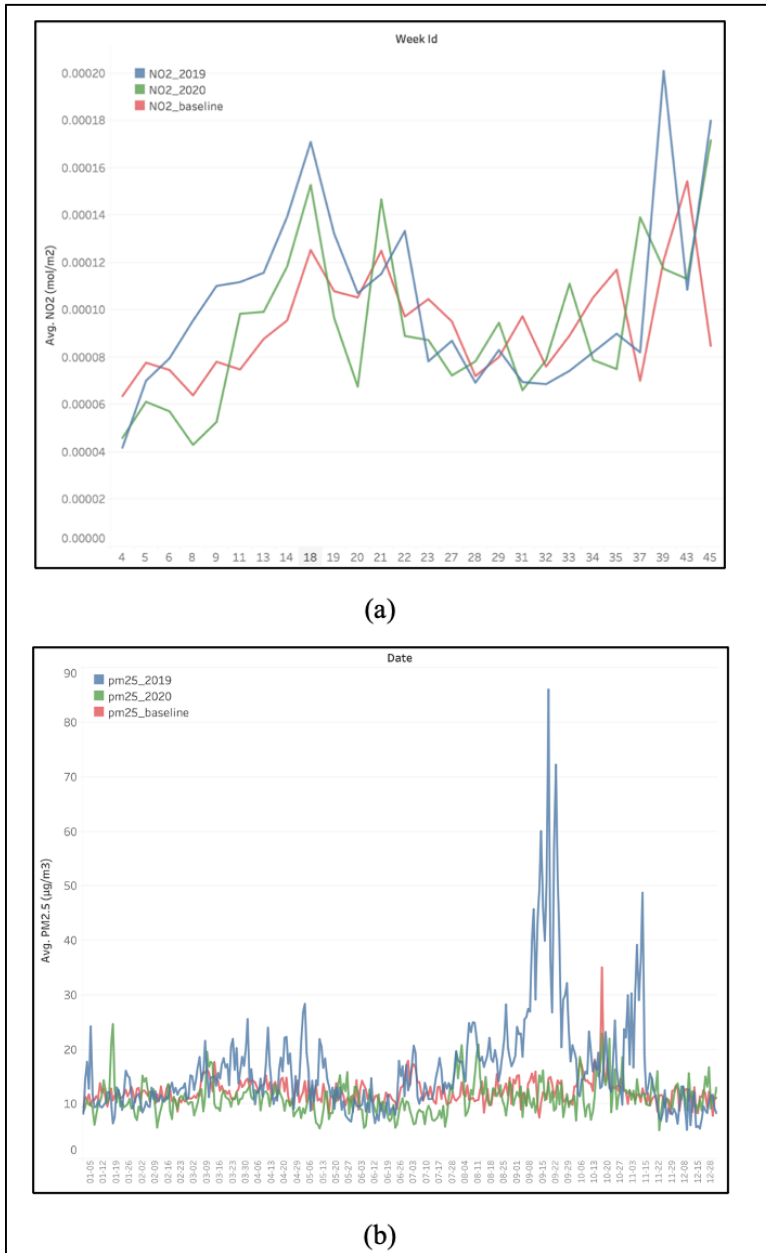

392

393 *Figure 1010. Comparison among measured (a) NO<sub>2</sub> levels and (b) PM<sub>2.5</sub> levels in 2019, 2020*

394 *and predicted baselines in 2020.*

395

### 396 3.2. Impact of COVID-19 on carpark and taxi availability

397 Figure 11 shows the weekly comparison of (a) taxi availability and (b) carpark availability

398 across Singapore in 2019 and 2020. The taxi availability was normalised by the monthly total

399 taxi count. From an overview, across the island, the total number of available taxis has little

400 difference between 2019 and 2020 with no clear pattern. However, it is worth noting that the

401 total number of available taxis in April – June 2020 is higher than the that for the same period  
402 in 2019 by up to 12.6%. On the other hand, the weekly comparison of carpark availability  
403 across Singapore dropped significantly at the beginning of April (Week 13) in 2020 by up to  
404 9.8% and remained lower than that in 2019 till the end of 2020. In general, pattern of the  
405 change in carpark availability was more apparent than that of taxi availability. The sudden  
406 drop in carpark availability following the start of lockdown in Singapore in early April  
407 suggests that more private vehicles were parked at home and implies a lower mobility. This is  
408 congruent with the findings from Li & Tartarini (2020). Similarly, the increase in the number  
409 of available taxis during the lockdown in 2020 as compared to 2019 also implies a decrease  
410 in human mobility. After the lockdown, carpark availability increased slowly, but remained  
411 lower than the same period last year, indicating the continued impact of COVID-19 on  
412 mobility. However, taxi availability decreased back to the same level as 2019 in a relatively  
413 short period of time.

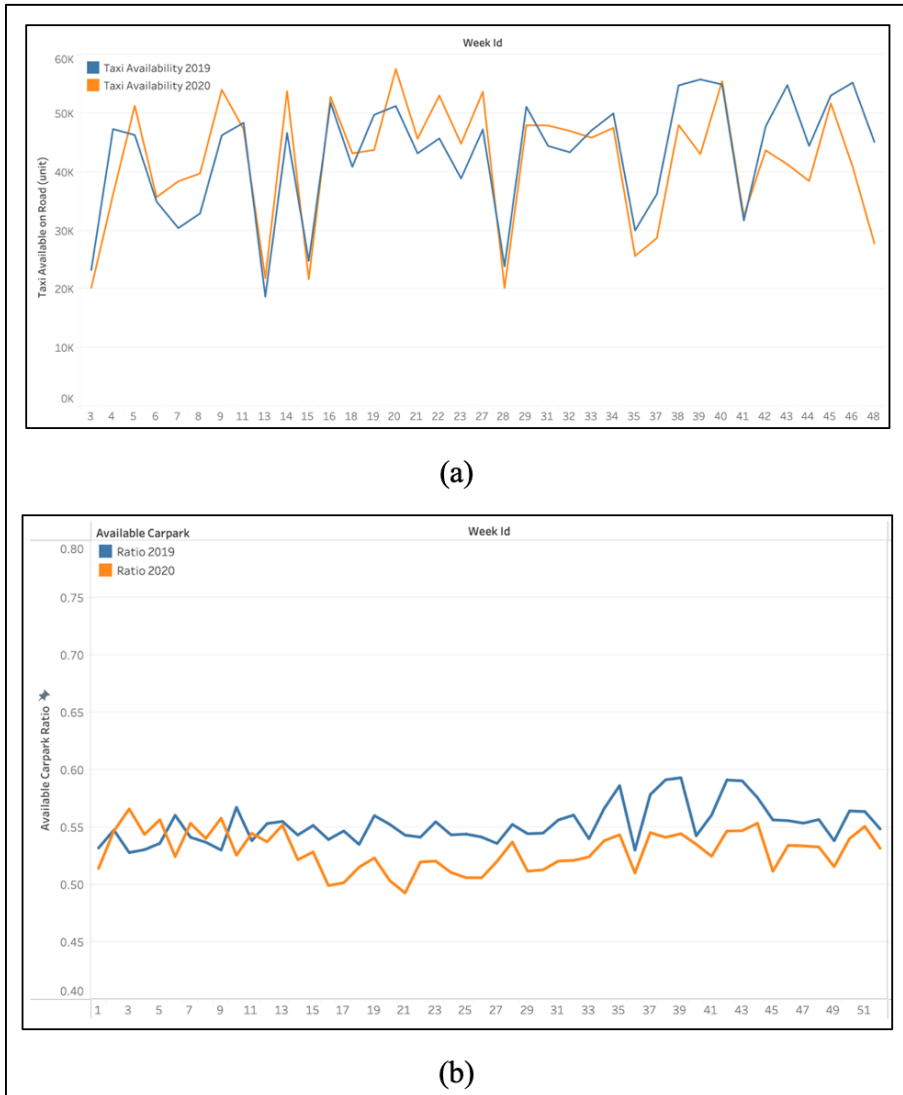

414

415 *Figure 11. A general comparison of (a) taxi availability and (b) carpark availability in 2019*  
 416 *and 2020*

417

### 418 3.3. Correlation of PM<sub>2.5</sub> and carpark availability

419 Across Singapore, the correlation between PM<sub>2.5</sub> levels and carpark availability changes is  
 420 extremely weak and insignificant (Table 5). Among the five regions, the correlation result  
 421 PM<sub>2.5</sub> only shows a statistically significant but weak positive correlation in the Central region.  
 422 This is due to the small change observed in PM<sub>2.5</sub> levels as discussed in Section 4.1.  
 423 Moreover, little variation was detected across the five regions mainly due to the data being  
 424 averaged into five regions, limiting a finer detection of spatial patterns.

425 *Table 5. Summary of 3 types of correlation results in between PM<sub>2.5</sub> level and the average*  
 426 *carpark availability changes in the whole island and 5 regions.*

| Region              | Pearson |       | Spearman's Rank |       | Kendall Rank |       |
|---------------------|---------|-------|-----------------|-------|--------------|-------|
|                     | r       | p     | rho             | p     | tau          | p     |
| <b>Whole Island</b> | 0.029   | 0.212 | 0.026           | 0.279 | 0.017        | 0.275 |
| <b>Central</b>      | 0.122*  | 0.021 | 0.103*          | 0.049 | 0.071*       | 0.046 |
| <b>East</b>         | 0.077   | 0.149 | 0.093           | 0.079 | 0.062        | 0.079 |
| <b>North</b>        | -0.052  | 0.331 | -0.057          | 0.282 | -0.039       | 0.266 |
| <b>South</b>        | 0.043   | 0.413 | 0.032           | 0.547 | 0.023        | 0.521 |
| <b>West</b>         | 0.078   | 0.139 | 0.063           | 0.237 | 0.043        | 0.228 |

427 \* Statistics are significant at 95% significance level.

428

#### 429 3.4. Correlation between NO<sub>2</sub> and taxi availability

430 The mean coefficients of Pearson Correlation, Spearman's Rank Correlation and Kendall  
 431 Rank Correlation between the correlation of NO<sub>2</sub> level and taxi availability changes across  
 432 Singapore are -0.320 (p= 0.049), -0.289 (p= 0.081), -0.210 (p= 0.067), respectively.

433 In general, the three correlation methods show similar spatial distributions at a spatial  
 434 resolution of 0.01° (Figures 12). Areas such as the South and East Coast area, show  
 435 significant negative correlations, suggesting that the change in taxi availability in these places  
 436 has a stronger correlation with the change in NO<sub>2</sub> levels when the correlation analysis was  
 437 performed for each point at a higher spatial resolution. The Pearson correlation coefficients  
 438 for some points were less than -0.5, exceeding the island-wide average of -0.32, while the  
 439 correlation coefficients for some points in the northern area were positive, indicating a  
 440 variation in correlations across the island. The reason for the positive correlation in the north  
 441 may be due to the inherent limitations of the taxi availability. There are a few points in the  
 442 north that have very limited number of taxis available (i.e., below 20 units per week), as well  
 443 as the corresponding change, making the change in taxi availability there may not be  
 444 representative for the mobility change. This spatial variation may also explain the  
 445 insignificant correlation results observed in the regional analysis between PM<sub>2.5</sub> and carpark  
 446 availability changes.



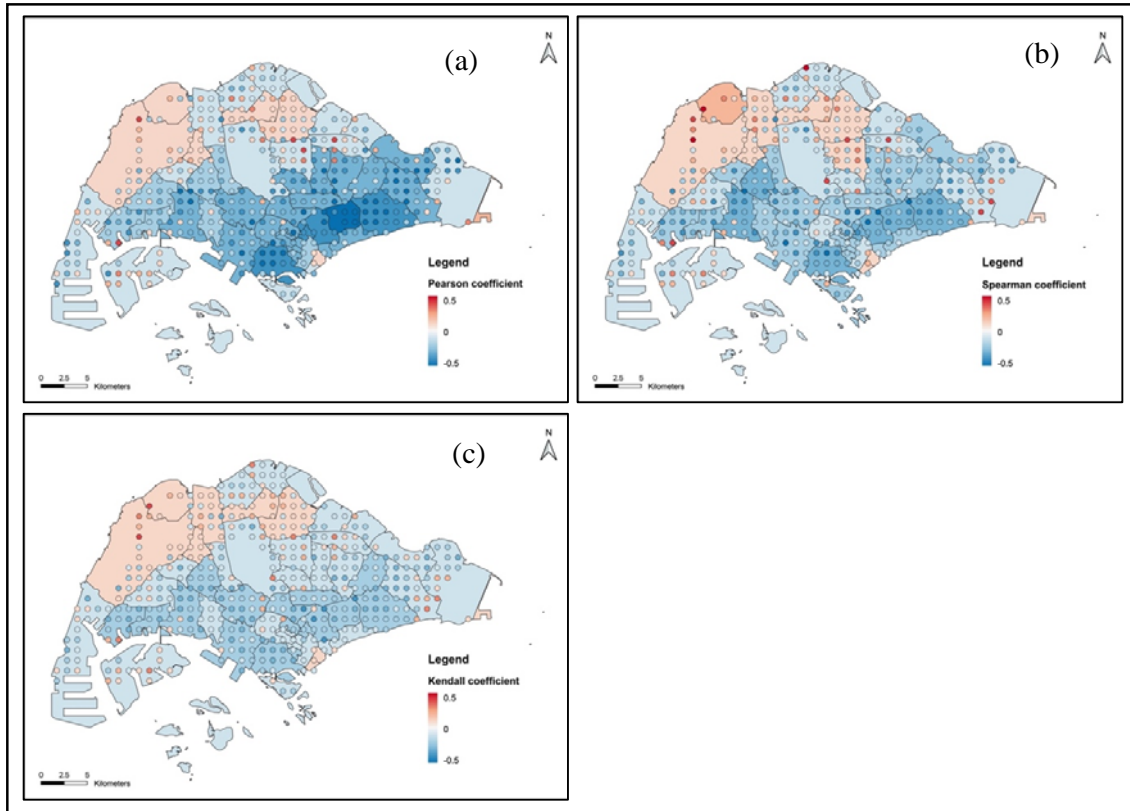

447

448 *Figure 12. Pearson (a), Spearman's Rank (b), Kendall Rank (c) Correlation coefficient*  
 449 *between NO<sub>2</sub> level and taxi availability changes in Singapore*

450

### 451 3.5. Spatial autocorrelation of correlation coefficients

452 Spatial autocorrelation were run for each NO<sub>2</sub> data point, as well as for each planning area  
 453 using all observations within the corresponding planning area. The hot and cold spot analysis  
 454 using the three correlation methods (Pearson, Spearman's Rank and Kendall Rank) revealed  
 455 generally similar spatial patterns (Figures 13). Notably, there is a clear north-south division in  
 456 the statistically significant hot and cold spots, with the cold spots in the South and East Coast  
 457 area, and hot spots in the north. For the non-parametric Spearman's and Kendall correlations,  
 458 the strength of the confidence in the south is slightly weaker, but still significant. This  
 459 suggests that in the South and East Coast areas, a decrease in mobility represented by an  
 460 increase in taxi availability could more possibly lead to a reduction in NO<sub>2</sub> due to the cluster  
 461 of stronger correlations compared to other areas.

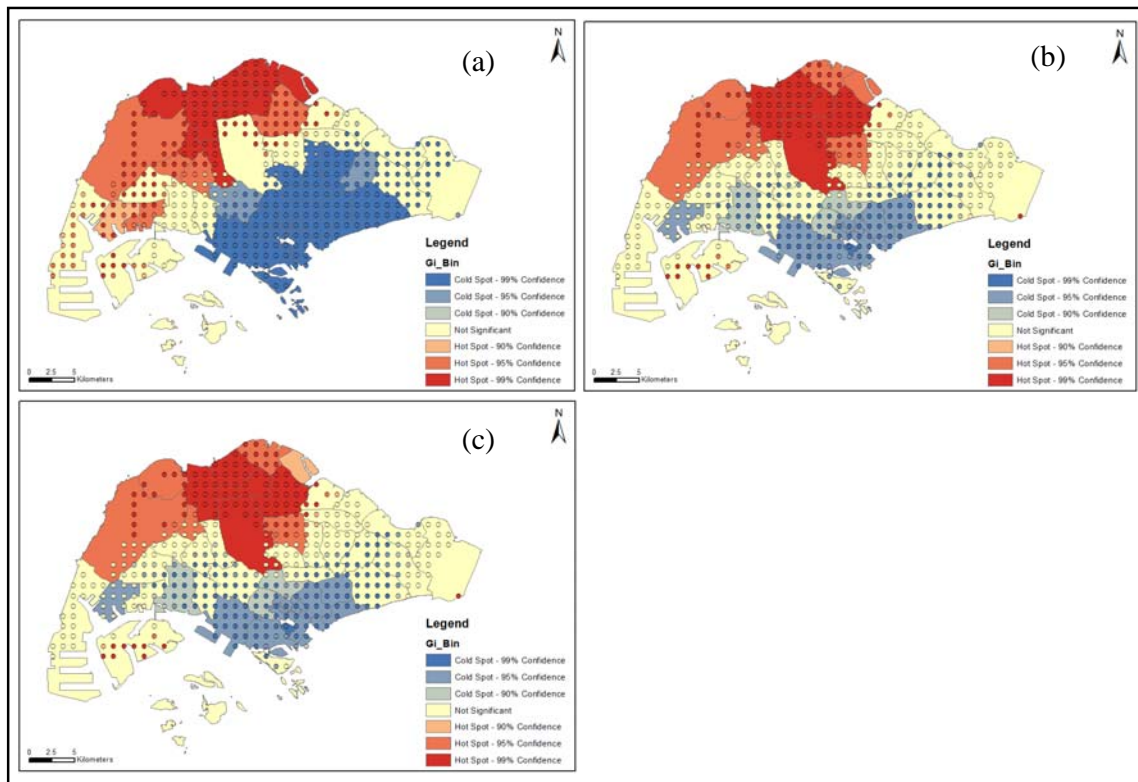

462  
 463 *Figure 13. Hot and cold spots of Pearson (a), Spearman's Rank (b), Kendall Rank (c)*  
 464 *Correlation coefficient between NO<sub>2</sub> level and taxi changes, for each point representing 0.01°*  
 465 *pixel, and URA Planning Areas.*

466

467 **4. Conclusions**

468 Studies worldwide have observed declines in air pollution due to COVID-19 lockdowns.  
 469 Similarly, this study also found that in 2020, both NO<sub>2</sub> and PM<sub>2.5</sub> declined (by a maximum of  
 470 38% and 36%, respectively) from the estimated 2020 baseline in Singapore. However, this  
 471 decline from the baseline is smaller than the decline from 2019 to 2020. This implies the  
 472 effect of COVID-19 on reducing NO<sub>2</sub> and PM<sub>2.5</sub> levels in Singapore could be over-estimated,  
 473 if air pollution changes are studied without the baseline prediction taking meteorological  
 474 factors into consideration. Taxi availability increased and carpark availability decreased by a  
 475 maximum of 12.6% and 9.8%, respectively, in 2020 from 2019 during lockdown. In general,  
 476 change in NO<sub>2</sub> was found more associated with the change in human mobility. Only weak  
 477 correlations were found between PM<sub>2.5</sub> levels and carpark availability. However, NO<sub>2</sub> and

478 taxi availability showed significant correlations and notable spatial patterns of the correlation  
479 coefficients were found, especially in the South and East Coast. As such, measures to reduce  
480 traffic or vehicular pollution in the South and East Coast could be effective in reducing NO<sub>2</sub>  
481 levels in these regions. Moreover, we assumed that the change in NO<sub>2</sub> and PM<sub>2.5</sub> are mainly  
482 due to the change of mobility and the emissions from other sectors are mostly consistent in  
483 this study, so future studies can also investigate changes in household or industrial emissions  
484 in addition to mobility patterns.

485

486 **References**

- 487 Addas, A. and Maghrabi, A., 2021. The Impact of COVID-19 Lockdowns on Air Quality—A  
488 Global Review. *Sustainability*, 13(18), p.10212.
- 489 Ahmad, S. S., Biiker, P., Emberson, L., & Shabbir, R. (2011). Monitoring nitrogen dioxide  
490 levels in urban areas in Rawalpindi, Pakistan. *Water, Air, & Soil Pollution*, 220(1),  
491 141-150.
- 492 Akoglu, H. (2018). User's guide to correlation coefficients. *Turkish journal of emergency  
493 medicine*, 18(3), 91-93.
- 494 Anderson, B., Dirks, K., (2020) A preliminary analysis of changes in outdoor air quality in  
495 the City of Southampton during the 2020 COVID-19 outbreak to date: a response to  
496 DEFRA's Call for Evidence<sup>1</sup> on Estimation of changes in air pollution emissions,  
497 concentrations and exposure during the COVID-19 outbreak in the UK. Southampton.  
498 Universty of Southampton 11pp. Available at: <https://eprints.soton.ac.uk/439813/>
- 499 Archer, C., Cervone, G., Golbazi, M., Al Fahel, N. and Hultquist, C., 2020. Changes in air  
500 quality and human mobility in the USA during the COVID-19 pandemic. *Bulletin of  
501 Atmospheric Science and Technology*, 1(3-4), pp.491-514.
- 502 Atalan, A. (2020) 'Is the lockdown important to prevent the COVID-19 pandemic? Effects on  
503 psychology, environment and economy-perspective', *Annals of Medicine and Surgery*,  
504 56, 38–42.
- 505 Bao, R. & Zhang, A. (2020) 'Does lockdown reduce air pollution? Evidence from 44 cities in  
506 northern China', *Science of The Total Environment*, 731, 139052.
- 507 Berg, R.G. van den (2021) Kendall's Tau - Simple Introduction. Available at:  
508 <https://www.spss-tutorials.com/kendalls-tau/> (Accessed: 23 November 2021).
- 509 Chok, N. S. (2010). *Pearson's versus Spearman's and Kendall's correlation coefficients for  
510 continuous data* (Doctoral dissertation, University of Pittsburgh).
- 511 Di Domenico, L., Pullano, G., Sabbatini, C.E., Boëlle, P.-Y. & Colizza, V. (2020) 'Impact of  
512 lockdown on COVID-19 epidemic in Île-de-France and possible exit strategies', *BMC  
513 Medicine*, 18, 240.
- 514 Dickens, B.L., Koo, J.R., Lim, J.T., Park, M., Quaye, S., Sun, H., Sun, Y., Pung, R., Wilder-  
515 Smith, A., Chai, L.Y.A., Lee, V.J. & Cook, A.R. (2020) 'Modelling lockdown and  
516 exit strategies for COVID-19 in Singapore', *The Lancet Regional Health - Western  
517 Pacific*, 1, 100004.

518 Doumbia, E., Brasseur, G., Gaubert, B., Liu, Y., Tilmes, S., Lacey, F., Deroubaix, A. &  
519 Wang, T. (2021) Changes in global air pollutant emissions during the COVID-19  
520 pandemic: a dataset for atmospheric chemistry modeling.

521 European Environmental Agency, 2019. *Emissions of the main air pollutants by sector group*  
522 *in the EEA-33*. Europe: European Environmental Agency.

523 Faridi, S., Yousefian, F., Janjani, H., Niazi, S., Azimi, F., Naddafi, K. and Hassanvand, M.,  
524 2021. The effect of COVID-19 pandemic on human mobility and ambient air quality  
525 around the world: A systematic review. *Urban Climate*, 38, p.100888.

526 Fu, F., Purvis-Roberts, K.L. & Williams, B. (2020) ‘Impact of the COVID-19 Pandemic  
527 Lockdown on Air Pollution in 20 Major Cities around the World’, *Atmosphere*,  
528 *Multidisciplinary Digital Publishing Institute*, 11, 1189.

529 Google. (2021). Google Trends: Explore what the world is searching. Available at  
530 <https://trends.google.com/trends/?geo=SG> (accessed November 2021).

531 Google Developers. (2021). Earth Engine Data Catalog. Available at  
532 <https://developers.google.com/earth-engine/datasets> (accessed November 2021).

533 Hua, J., Zhang, Y., de Foy, B., Shang, J., Schauer, J., Mei, X., Sulaymon, I. and Han, T.,  
534 2021. Quantitative estimation of meteorological impacts and the COVID-19  
535 lockdown reductions on NO<sub>2</sub> and PM<sub>2.5</sub> over the Beijing area using Generalized  
536 Additive Models (GAM). *Journal of Environmental Management*, 291, p.112676.

537 Iskandaryan, D., Ramos, F., & Trilles, S. (2020). Air quality prediction in smart cities using  
538 machine learning technologies based on sensor data: A review. *Applied Sciences*,  
539 10(7), 2401.

540 Jiang, P., Fu, X., Fan, Y.V., Klemeš, J.J., Chen, P., Ma, S. & Zhang, W. (2021) ‘Spatial-  
541 temporal potential exposure risk analytics and urban sustainability impacts related to  
542 COVID-19 mitigation: A perspective from car mobility behaviour’, *Journal of*  
543 *Cleaner Production*, 279, 123673.

544 Jiang, Z., Shi, H., Zhao, B., Gu, Y., Zhu, Y., Miyazaki, K., Lu, X., Zhang, Y., Bowman,  
545 K.W., Sekiya, T. and Liou, K.-N. (2021). Modeling the impact of COVID-19 on air  
546 quality in southern California: implications for future control policies. *Atmospheric*  
547 *Chemistry and Physics*, 21(11), pp.8693–8708.

548 Kanniah, K.D., Kamarul Zaman, N.A.F., Kaskaoutis, D.G. & Latif, M.T. (2020) ‘COVID-  
549 19’s impact on the atmospheric environment in the Southeast Asia region’, *Science of*  
550 *The Total Environment*, 736, 139658.

551 Kerimray, A., Baimatova, N., Ibragimova, O.P., Bukenov, B., Kenessov, B., Plotitsyn, P. &  
552 Karaca, F. (2020) ‘Assessing air quality changes in large cities during COVID-19  
553 lockdowns: The impacts of traffic-free urban conditions in Almaty, Kazakhstan’,  
554 *Science of The Total Environment*, 730, 139179.

555 Lai, S., Ruktanonchai, N., Zhou, L., Prosper, O., Luo, W., Floyd, J., Wesolowski, A.,  
556 Santillana, M., Zhang, C., Du, X., Yu, H. and Tatem, A., 2020. Effect of non-  
557 pharmaceutical interventions to contain COVID-19 in China. *Nature*, 585(7825),  
558 pp.410-413.

559 Li, J. & Tartarini, F. (2020) ‘Changes in Air Quality during the COVID-19 Lockdown in  
560 Singapore and Associations with Human Mobility Trends’, *Aerosol and Air Quality*  
561 *Research*, Taiwan Association for Aerosol Research, 20, 1748–1758.

562 Li, L., Li, Q., Huang, L., Wang, Q., Zhu, A., Xu, J., Liu, Ziyi, Li, H., Shi, L., Li, R., Azari,  
563 M., Wang, Y., Zhang, X., Liu, Zhiqiang, Zhu, Y., Zhang, K., Xue, S., Ooi, M.C.G.,  
564 Zhang, D. & Chan, A. (2020) ‘Air quality changes during the COVID-19 lockdown  
565 over the Yangtze River Delta Region: An insight into the impact of human activity  
566 pattern changes on air pollution variation’, *Science of The Total Environment*, 732,  
567 139282.

568 Liu, Q., Malarvizhi, A.S., Liu, W., Xu, H., Harris, J.T., Yang, J., Duffy, D.Q., Little, M.M.,  
569 Sha, D., Lan, H. and Yang, C. (2021). Spatiotemporal changes in global nitrogen  
570 dioxide emission due to COVID-19 mitigation policies. *Science of the Total*  
571 *Environment*, 776, 146027.

572 LTA Singapore. (2021). LTA DataMall. Available at  
573 <https://datamall.lta.gov.sg/content/datamall/en.html> (accessed November 2021).

574 Megaritis, A. G., Fountoukis, C., Charalampidis, P. E., Denier Van Der Gon, H. A. C., Pilinis,  
575 C., & Pandis, S. N. (2014). Linking climate and air quality over Europe: effects of  
576 meteorology on PM 2.5 concentrations. *Atmospheric Chemistry and Physics*, 14(18),  
577 10283-10298.

578 Ministry of Health (2020a) ‘CIRCUIT BREAKER TO MINIMISE FURTHER SPREAD OF  
579 COVID-19’. Available at: [https://www.moh.gov.sg/news-highlights/details/circuit-](https://www.moh.gov.sg/news-highlights/details/circuit-breaker-to-minimise-further-spread-of-covid-19)  
580 [breaker-to-minimise-further-spread-of-covid-19](https://www.moh.gov.sg/news-highlights/details/circuit-breaker-to-minimise-further-spread-of-covid-19) (accessed November 2021).

581 Ministry of Health (2020b) ‘END OF CIRCUIT BREAKER, PHASED APPROACH TO  
582 RESUMING ACTIVITIES SAFELY’. Available at: <https://www.moh.gov.sg/news->

583 highlights/details/end-of-circuit-breaker-phased-approach-to-resuming-activities-  
584 safely (accessed November 2021).

585 Ministry of Transport, 2021. *MOT Singapore – Gain new perspectives on land, sea & air*  
586 *transport*. [online] Mot.gov.sg. Available at: <[https://www.mot.gov.sg/Transport-](https://www.mot.gov.sg/Transport-Matters/motoring/Detail/how-erp-works-as-a-speed-booster)  
587 [Matters/motoring/Detail/how-erp-works-as-a-speed-booster](https://www.mot.gov.sg/Transport-Matters/motoring/Detail/how-erp-works-as-a-speed-booster)> [Accessed 12 November  
588 2021].

589 National Environment Agency. (2021a). ‘Air Quality’. Available at:  
590 <https://www.nea.gov.sg/our-services/pollution-control/air-pollution/air-quality>  
591 (accessed November 2021).

592 National Environment Agency. (2021b). ‘Regional hourly PM2.5 value measured in  $\mu\text{g}/\text{m}^3$ ’,  
593 Data.gov.sg. Available at: <https://data.gov.sg/dataset/pm2-5> (accessed November  
594 2021).

595 National Environment Agency. (2021c). ‘Realtime Weather Readings across Singapore’,  
596 Data.gov.sg. Available at: <https://data.gov.sg/dataset/realtime-weather-readings>  
597 (accessed November 2021).

598 National Environment Agency. (2021d). ‘Observing The Weather’ Available at:  
599 [http://www.weather.gov.sg/learn\\_observations/](http://www.weather.gov.sg/learn_observations/) (accessed November 2021).

600 Otmani, A., Benchrif, A., Tahri, M., Bounakhla, M., Chakir, E.M., El Bouch, M. and Krombi,  
601 M. (2020). Impact of COVID-19 lockdown on PM10, SO2 and NO2 concentrations in  
602 Salé City (Morocco). *Sci. Total Environ.* 735: 139541.  
603 <https://doi.org/10.1016/j.scitotenv.2020.139541>

604 Rybarczyk, Y., & Zalakeviciute, R. (2018). Machine learning approaches for outdoor air  
605 quality modelling: A systematic review. *Applied Sciences*, 8(12), 2570.

606 Seinfeld, J.H. and Pandis, S.N. (2016). *Atmospheric chemistry and physics : from air*  
607 *pollution to climate change*. Hoboken, Nj: Wiley.

608 Singapore Statista. (2021). *Singapore: population living in public housing 2018*. Statista.  
609 [https://www.statista.com/statistics/966747/population-living-in-public-housing-](https://www.statista.com/statistics/966747/population-living-in-public-housing-singapore/)  
610 [singapore/](https://www.statista.com/statistics/966747/population-living-in-public-housing-singapore/)

611 Sun, X., Wandelt, S., Zheng, C. & Zhang, A. (2021) ‘COVID-19 pandemic and air  
612 transportation: Successfully navigating the paper hurricane’, *Journal of Air Transport*  
613 *Management*, 94, 102062.

614 Tan, C. (2020) ‘Roads become more free-flowing and safer but speeding cases surge’, *The*  
615 *Straits Times*, 13 May.

616 Tarsitano, A., 2009. Comparing the effectiveness of rank correlation statistics. P: Dip. di  
617 Economia e Statistica, University of della Calabria.

618 Taufik, k. (2020). Commentary: Little smoke this haze season – but fires rage on in Indonesia.  
619 Retrieved 3 November 2021, from  
620 [https://www.channelnewsasia.com/commentary/indonesia-forest-fire-peat-haze-palm-](https://www.channelnewsasia.com/commentary/indonesia-forest-fire-peat-haze-palm-oil-jokowi-omnibus-bill-681301)  
621 [oil-jokowi-omnibus-bill-681301](https://www.channelnewsasia.com/commentary/indonesia-forest-fire-peat-haze-palm-oil-jokowi-omnibus-bill-681301)

622 Velasco, E. (2021) ‘Impact of Singapore’s COVID-19 confinement on atmospheric CO2  
623 fluxes at neighborhood scale’, *Urban Climate*, 37, 100822.

624 Wackernagel, H. (2003). Ordinary kriging. In *Multivariate geostatistics* (pp. 79-88). Springer,  
625 Berlin, Heidelberg.

626 Wang, J., & Song, G. (2018). A deep spatial-temporal ensemble model for air quality  
627 prediction. *Neurocomputing*, 314, 198-206.

628 World Health Organization (2021) ‘Coronavirus Disease (COVID-19) - events as they  
629 happen’. Available at: [https://www.who.int/emergencies/diseases/novel-coronavirus-](https://www.who.int/emergencies/diseases/novel-coronavirus-2019/events-as-they-happen)  
630 [2019/events-as-they-happen](https://www.who.int/emergencies/diseases/novel-coronavirus-2019/events-as-they-happen) (accessed October 2021).

631 Xu, G., Jiao, L., Zhao, S., Yuan, M., Li, X., Han, Y., ... & Dong, T. (2016). Examining the  
632 impacts of land use on air quality from a spatio-temporal perspective in Wuhan, China.  
633 *Atmosphere*, 7(5), 62.

634 Yin, L., Zhang, H., Li, Y., Liu, K., Chen, T., Luo, W., Lai, S., Li, Y., Tang, X., Ning, L.,  
635 Feng, S., Wei, Y., Zhao, Z., Wen, Y., Mao, L. and Mei, S., 2021. A data driven agent-  
636 based model that recommends non-pharmaceutical interventions to suppress  
637 Coronavirus disease 2019 resurgence in megacities. *Journal of The Royal Society*  
638 *Interface*, 18(181), p.20210112.

639 Yousefian, F., Faridi, S., Azimi, F., Aghaei, M., Shamsipour, M., Yaghmaeian, K. and  
640 Hassanvand, M.S. (2020). Temporal variations of ambient air pollutants and  
641 meteorological influences on their concentrations in Tehran during 2012–2017.  
642 *Scientific Reports*, 10(1), p.292.

643 Zhan, Y., Luo, Y., Deng, X., Grieneisen, M. L., Zhang, M., & Di, B. (2018). Spatiotemporal  
644 prediction of daily ambient ozone levels across China using random forest for human  
645 exposure assessment. *Environmental Pollution*, 233, 464-473.

646 Zhu, Yan, Ke Mao and Xuyao Zhang “Air Pollution and Mobility in Singapore during  
647 COVID-19 Pandemic”, Technical Working Paper #04-2020, Asia Competitiveness  
648 Institute Technical Working Paper Series (September 2020).

649
